# Supplementary material for: Does polyandry really pay off? The effects of multiple mating and number of fathers on morphological traits and survival in clutches of nesting green turtles at Tortuguero
Source: PeerJ. 2015 Apr 7;3:e880. doi: 10.7717/peerj.880 (PMC4393808; doi:10.7717/peerj.880)
Supplement: Supplemental Information 2 — Inferred father genotypes per each individual nest using the final four microsatellite loci. And estimated amount of offspring that each father provided progenity to. [file peerj-03-880-s002.xls]

## Sheet: Sheet1
N01	Father1	193/193	177/177	128/128	289/273	3	4.082e-09
	Father2	193/189	169/177	128/134	277/287	11	4.082e-09		Inferred father genotypes using the final four microsatellite loci for all nests. And estimated amount of offspring that each father provided progenity to.
	Father3	189/175	177/177	128/134	275/289	6	4.082e-09
N02	Father1	193/187	171/161	132/134	235/239	3	1.426e-09
	Father2	193/187	171/161	134/134	293/283	11	1.426e-09
	Father3	179/195	171/169	132/134	271/273	6	1.426e-09
N03	Father1	179/187	161/165	134/134	233/239	6	1
N04	Father1	181/185	161/163	140/134	243/259	19	1.664e-07
	Father2	185/185	161/161	142/142	243/243	2	1.664e-07
N05	Father1	175/193	171/163	140/142	275/247	17	4.382e-09
	Father2	177/177	171/163	140/140	275/247	3	4.382e-09
N06	Father1	187/181	165/165	152/140	271/231	8	3.944e-13
	Father2	187/181	165/169	152/140	269/233	8	3.944e-13
	Father3	185/181	169/169	152/134	233/281	6	3.944e-13
N07	Father1	181/187	169/169	134/134	231/257	20	1
N08	Father1	195/183	169/171	136/134	233/247	19	2.375e-08
	Father2	183/183	171/171	140/140	233/233	1	2.375e-08
N09	Father1	173/161	163/189	134/138	233/233	10	1
N10	Father1	197/207	163/171	134/136	233/237	5	2.446e-11
	Father2	185/195	165/169	134/136	237/247	11	2.446e-11
	Father3	195/195	165/165	140/140	237/237	1	2.446e-11
	Father4	187/175	163/157	134/134	233/237	3	2.446e-11
N11	Father1	185/185	163/157	136/136	281/261	3	4.574e-09
	Father2	185/179	169/163	136/152	259/281	10	4.574e-09
	Father3	179/183	163/163	152/138	293/291	3	4.574e-09
	Father4	183/193	163/163	138/134	231/295	4	4.574e-09
	Father5	177/177	157/157	134/134	273/273	1	4.574e-09
N12	Father1	187/183	169/169	134/140	279/277	4	1.227e-09
	Father2	187/183	169/163	134/142	257/277	8	1.227e-09
	Father3	187/183	163/157	134/140	257/233	11	1.227e-09
N13	Father1	195/195	171/165	138/136	271/269	11	3.741e-09
	Father2	195/187	171/165	138/134	271/271	16	3.741e-09
N14	Father1	215/215	169/169	142/144	279/279	4	1.923e-08
	Father2	215/177	169/169	138/136	281/279	9	1.923e-08
	Father3	215/177	169/169	136/134	283/283	3	1.923e-08
	Father4	215/193	169/169	140/128	279/279	2	1.923e-08
	Father5	193/209	165/165	140/134	277/291	2	1.923e-08
